## Localizing components of shared transethnic genetic architecture of complex traits from GWAS summary data

Huwenbo Shi,<sup>1-3\*†</sup> Kathryn S. Burch,<sup>1\*†</sup> Ruth Johnson,<sup>4</sup> Malika K. Freund,<sup>5</sup> Gleb Kichaev,<sup>1</sup> Nicholas Mancuso,<sup>6</sup> Astrid M. Manuel,<sup>7</sup> Natalie Dong,<sup>8</sup> and Bogdan Pasaniuc<sup>1,5,9,10,†</sup>

1. Bioinformatics Interdepartmental Program, University of California, Los Angeles, Los Angeles, CA
2. Department of Epidemiology, Harvard T.H. Chan School of Public Health, Boston, MA
3. Program in Medical and Population Genetics, Broad Institute of MIT and Harvard, Cambridge, MA
4. Department of Computer Science, University of California, Los Angeles, Los Angeles, CA
5. Department of Human Genetics, David Geffen School of Medicine, University of California, Los Angeles, Los Angeles, CA
6. Center for Genetic Epidemiology, Department of Preventive Medicine, Keck School of Medicine, University of Southern California, Los Angeles, CA
7. Department of Biological Sciences, Florida International University, Miami, FL
8. Department of Biomedical Engineering, Boston University, Boston, MA
9. Department of Pathology and Laboratory Medicine, David Geffen School of Medicine, University of California, Los Angeles, Los Angeles, CA
10. Department of Computational Medicine, David Geffen School of Medicine, University of California, Los Angeles, Los Angeles, CA

\* These authors contributed equally to this work

† Correspondence: H.S. ([hshi@hsph.harvard.edu](mailto:hshi@hsph.harvard.edu)), K.S.B. ([kathrynburch@ucla.edu](mailto:kathrynburch@ucla.edu)), or B.P. ([pasaniuc@ucla.edu](mailto:pasaniuc@ucla.edu))

## 1 **Abstract**

2 Despite strong transethnic genetic correlations reported in the literature for many complex traits, the non-  
3 transferability of polygenic risk scores across populations suggests the presence of population-specific  
4 components of genetic architecture. We propose an approach that models GWAS summary data for one  
5 trait in two populations to estimate genome-wide proportions of population-specific/shared causal SNPs.  
6 In simulations across various genetic architectures, we show that our approach yields approximately  
7 unbiased estimates with in-sample LD and slight upward-bias with out-of-sample LD. We analyze 9  
8 complex traits in individuals of East Asian and European ancestry, restricting to common SNPs (MAF >  
9 5%), and find that most common causal SNPs are shared by both populations. Using the genome-wide  
10 estimates as priors in an empirical Bayes framework, we perform fine-mapping and observe that high-  
11 posterior SNPs (for both the population-specific and shared causal configurations) have highly correlated  
12 effects in East Asians and Europeans. In population-specific GWAS risk regions, we observe a 2.8x  
13 enrichment of shared high-posterior SNPs, suggesting that population-specific GWAS risk regions harbor  
14 shared causal SNPs that are undetected in the other GWAS due to differences in LD, allele frequencies,  
15 and/or sample size. Finally, we report enrichments of shared high-posterior SNPs in 53 tissue-specific  
16 functional categories and find evidence that SNP-heritability enrichments are driven largely by many low-  
17 effect common SNPs.

## 18 Introduction

19 Genetic and phenotypic variations among humans have been shaped by many factors, including migration  
20 histories, geodemographic events, and environmental background<sup>1-5</sup>. As a result, the underlying genetic  
21 architecture of a given complex trait – defined here in terms of ‘polygenicity’ (the number of variants with  
22 nonzero effects)<sup>6-10</sup> and the coupling of causal effect sizes with minor allele frequency (MAF)<sup>11,12</sup>, linkage  
23 disequilibrium (LD)<sup>13-15</sup>, and other genomic features<sup>16</sup> – varies among ancestral populations. While the vast  
24 majority of genome-wide association studies (GWAS) to date have been performed in individuals of  
25 European descent<sup>17-20</sup>, growing numbers of studies performed in individuals of non-European ancestry<sup>21-27</sup>  
26 have created opportunities for well-powered transethnic genetic studies<sup>21,22,24,26,28-33</sup>.

27 Risk regions identified through GWAS tend to replicate across populations<sup>17,21,22,33-35</sup>, indicating  
28 that complex traits have shared genetic components among populations. Indeed, for certain post-GWAS  
29 analyses such as disease mapping<sup>23,31,36</sup> and statistical fine-mapping<sup>28,37-40</sup>, under the assumption that two  
30 populations share one or more causal variants, population-specific LD patterns can be leveraged to improve  
31 performance over approaches that model a single population. On the other hand, several studies have shown  
32 that heterogeneity in genetic architectures limits transferability of polygenic risk scores (PRS) across  
33 populations<sup>5,41-48</sup>; critically, if applied in a clinical setting, existing PRS may exacerbate health disparities  
34 among ethnic groups<sup>49</sup>. The population-specificity of existing PRS as well as estimates of transethnic  
35 genetic correlations less than one reported in the literature<sup>30,50-53</sup> indicate that (1) LD tagging and allele  
36 frequencies of shared causal variants vary across populations, (2) that a sizeable number of causal variants  
37 are population-specific, and/or (3) that causal effect sizes vary across populations due to, for example,  
38 different gene-environment interactions. For example, due to population-specific LD, a single genetic  
39 variant that is significantly associated with a trait in two populations may actually be tagging distinct  
40 population-specific causal variants (Figure 1). Conversely, two distinct associations in two populations may  
41 be driven by the same underlying causal variants (i.e. colocalization). Thus, identifying shared and  
42 population-specific components of genetic architecture could help improve transethnic analyses (e.g.,  
43 transferability of PRS across populations<sup>19,41,42,45,46</sup>) and uncover novel disease etiologies.

44 In this work, we introduce PESCA (Population-spEcific/Shared Causal vAriants), an approach that  
45 requires only GWAS summary association statistics and ancestry-matched estimates of LD to infer genome-  
46 wide proportions of population-specific and shared causal variants for a single trait in two populations.  
47 These estimates are then used as priors in an empirical Bayes framework to localize and test for enrichment  
48 of population-specific/shared causal variants in regions of interest. In this context, a “causal variant” is a  
49 variant measured in the given GWAS that either has a nonzero effect on the trait (e.g., a nonsynonymous  
50 variant that alters protein folding) or tags a nonzero effect at an unmeasured variant through LD. It is  
51 therefore important to note that the set of “causal variants” that PESCA aims to identify is defined with

52 respect to the set of variants included in the GWAS and can contain variants with indirect nonzero effects  
53 that are statistical rather than biological in nature (this is analogous to the definition of SNP-heritability,  
54 which is also a function of a specific set of SNPs<sup>11,54-56</sup>). Through extensive simulations, we show that our  
55 method yields approximately unbiased estimates of the proportions of population-specific/shared causal  
56 variants if in-sample LD is used and slightly upward-biased estimates if LD is estimated from an external  
57 reference panel. We then show that using these estimates as priors to perform fine-mapping (Methods)  
58 produces well-calibrated per-SNP posterior probabilities and enrichment test statistics. We note that the  
59 definition of enrichment used here is related to, but conceptually distinct from, definitions of SNP-  
60 heritability enrichment<sup>13,16</sup>. Under our framework, an enrichment of causal SNPs greater than 1 indicates  
61 that, compared to the genome-wide background, there are more causal SNPs in that region than expected<sup>57,58</sup>  
62 (Methods). In contrast, an enrichment of SNP-heritability greater than 1 indicates that the average per-SNP  
63 effect size in the region is larger than the genome-wide average per-SNP effect size.

64 We apply our approach to publicly available GWAS summary statistics for 9 complex traits and  
65 diseases in individuals of East Asian (EAS) and European (EUR) ancestry (average  $N_{EAS} = 94,621$ ,  $N_{EUR} =$   
66  $103,507$ ) (Table 1), restricting to common SNPs ( $MAF > 5\%$ ) and using 1000 Genomes<sup>59</sup> to estimate  
67 ancestry-matched LD. On average across the 9 traits, we estimate that approximately 80% (S.D. 15%) of  
68 common SNPs that are causal in EAS and 84% (S.D. 8%) of those in EUR are shared by the other population.  
69 Consistent with previous studies based on SNP-heritability<sup>55,60</sup>, we find that high-posterior SNPs are  
70 distributed uniformly across the genome. We observe that population-specific GWAS risk regions have, on  
71 average across the 9 traits, a 2.8x enrichment of shared high-posterior SNPs relative to the genome-wide  
72 background, suggesting that many EAS-specific and EUR-specific GWAS risk regions harbor shared causal  
73 SNPs that are undetected in the other population due to differences in LD, allele frequencies, and/or GWAS  
74 sample size. The effects of SNPs with posterior probability  $> 0.8$  of being causal (for any causal  
75 configuration) are highly correlated between EAS and EUR, concordant with replication slopes between  
76 EAS and EUR marginal effects close to 1 that have been reported for several complex diseases<sup>33</sup> and with  
77 strong transethnic genetic correlations previously reported for the same traits analyzed in this work (average  
78  $\hat{\rho}_g = 0.79 \pm 0.07$  s.e.m. across the 9 traits)<sup>51</sup>. Finally, we show that regions flanking genes that are  
79 specifically expressed in trait-relevant tissues<sup>61</sup> harbor a disproportionate number of shared high-posterior  
80 SNPs – many of the same tissue-specific gene sets are also enriched with SNP-heritability, implying that  
81 SNP-heritability enrichments are driven by many low-effect SNPs rather than a small number of high-effect  
82 SNPs. Our results suggest that common causal SNPs have similar etiological roles in EAS and EUR and  
83 that transferability of PRS and other GWAS findings across populations can be improved by explicitly  
84 correcting for population-specific LD and allele frequencies.

85

## 86 **Material and Methods**

### 87 **Distribution of GWAS summary statistics in two populations**

88 For a given complex trait, we model the causal statuses of SNP  $i$  in two populations as a binary vector of  
 89 size two,  $\mathbf{C}_i = c_{i1}c_{i2}$ , where each bit,  $c_{i1} \in \{0,1\}$  and  $c_{i2} \in \{0,1\}$ , represents the causal status of SNP  $i$  in  
 90 populations 1 and 2, respectively.  $\mathbf{C}_i = 00$  indicates that SNP  $i$  is not causal in either population;  $\mathbf{C}_i = 01$   
 91 and  $\mathbf{C}_i = 10$  indicate that SNP  $i$  is causal only in the first and second population, respectively; and  $\mathbf{C}_i =$   
 92  $11$  indicates that SNP  $i$  is causal in both populations. We assume  $\mathbf{C}_i$  follows a multivariate Bernoulli (MVB)  
 93 distribution<sup>62,63</sup>

$$94 \quad \mathbf{C}_i \sim \text{MVB}(f_{00}, f_{01}, f_{10}, f_{11})$$

95 in order to facilitate optimization and interpretation (Supplemental Note). Assuming the causal status vector  
 96 of a SNP is independent from those of other SNPs ( $\mathbf{C}_i \perp \mathbf{C}_j$  for  $i \neq j$ ), the joint probability of the causal  
 97 statuses of  $p$  SNPs is  $\Pr(\mathbf{C}_1, \dots, \mathbf{C}_p) = \prod_{i=1}^p \Pr(\mathbf{C}_i)$ .

98 Given two genome-wide association studies with sample sizes  $n_1$  and  $n_2$  for the first and second  
 99 populations, respectively, we derive the distribution of  $Z$ -scores,  $\mathbf{Z}_1$  and  $\mathbf{Z}_2$  (both are  $p \times 1$  vectors),  
 100 conditional on the causal status vectors for each population,  $\mathbf{c}_1 = (c_{11}, \dots, c_{p1})^T$  and  $\mathbf{c}_2 = (c_{12} \dots c_{p2})^T$ .  
 101 Although it is reasonable to suspect that there are nonzero cross-population correlations of effect sizes at  
 102 shared causal SNPs, to facilitate inference, we impose the (potentially strong) assumption that  $\mathbf{Z}_1$  and  $\mathbf{Z}_2$   
 103 are independent given  $\mathbf{c}_1$  and  $\mathbf{c}_2$ . Thus, for population  $j$ ,

$$104 \quad \mathbf{Z}_j | \mathbf{c}_j \sim \text{MVN}(\mathbf{0}, \mathbf{V}_j + \sigma_j^2 \mathbf{V}_j \text{diag}(\mathbf{c}_j) \mathbf{V}_j)$$

105 where  $\mathbf{V}_j$  is the  $p \times p$  LD matrix for population  $j$ ;  $\text{diag}(\mathbf{c}_j)$  is a diagonal matrix in which the  $k$ -th diagonal  
 106 element is 1 if  $c_{kj} = 1$  and 0 if  $c_{kj} = 0$ ; and  $\sigma_j^2 = \frac{n_j h_{gj}^2}{|\mathbf{c}_j|}$ , where  $h_{gj}^2$  and  $|\mathbf{c}_j|$  are the SNP-heritability of the  
 107 trait and the number of causal SNPs, respectively, in population  $j$  (Supplemental Note).

108 Finally, we derive the joint probability of  $\mathbf{Z}_1$  and  $\mathbf{Z}_2$  by integrating over all possible causal status  
 109 vectors in the two populations:

$$113 \quad \Pr(\mathbf{Z}_1, \mathbf{Z}_2; \mathbf{f}) = \sum_{\mathbf{c}_1} \sum_{\mathbf{c}_2} \left[ \prod_{i=1}^p \Pr(\mathbf{C}_i = c_{i1}c_{i2}) \prod_{j=1}^2 N(\mathbf{Z}_j; \mathbf{0}, \mathbf{V}_j + \sigma_j^2 \mathbf{V}_j \text{diag}(\mathbf{c}_j) \mathbf{V}_j) \right] \quad (1)$$

110 where  $\mathbf{f} = (f_{00}, f_{01}, f_{10}, f_{11})$  is the vector of parameters of the MVB distribution. In practice, we partition  
 111 the genome into approximately independent regions<sup>64</sup> and model the distribution of  $Z$ -scores at all regions  
 112 as the product of the distribution of  $Z$ -scores in each region (Supplemental Note).

114

## 115 **Estimating genome-wide proportions of population-specific/shared causal SNPs**

116 We use Expectation-Maximization (EM) coupled with Markov Chain Monte Carlo (MCMC) to maximize  
117 the likelihood function in Equation (1) over the MVB parameters  $\mathbf{f}$ . We initialize  $\mathbf{f}$  to  $\mathbf{f} =$   
118  $(0, -3.9, -3.9, 3.9)$  which corresponds to 2% of SNPs being causal in population 1, 2% being causal in  
119 population 2, and 2% being shared causals. In the expectation step, we approximate the surrogate function  
120  $Q(\mathbf{f}|\mathbf{f}^{(t)})$  using an efficient Gibbs sampler; in the maximization step, we maximize  $Q(\mathbf{f}|\mathbf{f}^{(t)})$  using  
121 analytical formulae (Supplemental Note). From the estimated  $\mathbf{f}$ , denoted  $\mathbf{f}^*$ , we recover the proportions of  
122 population-specific and shared causal SNPs. For computational efficiency, we apply the EM algorithm to  
123 each chromosome in parallel and aggregate the chromosomal estimates to obtain estimates of the genome-  
124 wide proportions of population-specific/shared causal SNPs (Supplemental Note).

125

## 126 **Evaluating per-SNP posterior probabilities of being causal in a single or both populations**

127 We estimate the posterior probability of each SNP to be causal in a single population (population-specific)  
128 or both populations (shared), using the estimated genome-wide proportions of population-specific and  
129 shared causal variants (obtained from  $\mathbf{f}^*$ ) as prior probabilities in an empirical Bayes framework.  
130 Specifically, for each SNP  $i$ , we evaluate the posterior probabilities  $\Pr(\mathbf{C}_i = 01|\mathbf{Z}_1, \mathbf{Z}_2; \mathbf{f}^*)$ ,  $\Pr(\mathbf{C}_i =$   
131  $10|\mathbf{Z}_1, \mathbf{Z}_2; \mathbf{f}^*)$ , and  $\Pr(\mathbf{C}_i = 11|\mathbf{Z}_1, \mathbf{Z}_2; \mathbf{f}^*)$ . Since evaluating these probabilities requires integrating over  
132 the posterior probabilities of all  $2^{(2p)}$  possible causal status configurations, we use a Gibbs sampler to  
133 efficiently approximate the posterior probabilities (Supplemental Note).

134

## 135 **Estimating the numbers of population-specific/shared causal SNPs in a region**

136 We infer the posterior expected numbers of population-specific/shared causal SNPs in a region (e.g., an LD  
137 block or a chromosome) conditional on the Z-scores ( $\mathbf{Z}_1$  and  $\mathbf{Z}_2$ ) by summing, across all SNPs in the region,  
138 the per-SNP posterior probabilities of being causal in a single or both populations. For example, in a region  
139 with  $p$  SNPs, the posterior expected number of shared causal SNPs is  $E[q_{11}|\mathbf{Z}_1, \mathbf{Z}_2; \mathbf{f}^*] =$   
140  $\sum_{i=1}^p E[1_{\{\mathbf{C}_i=11\}}|\mathbf{Z}_1, \mathbf{Z}_2; \mathbf{f}^*] = \sum_{i=1}^p \Pr(\mathbf{C}_i = 11|\mathbf{Z}_1, \mathbf{Z}_2; \mathbf{f}^*)$ . Since SNPs in a region are highly correlated,  
141 invalidating the use of jackknife to estimate standard errors, we refrain from reporting standard errors of  
142 the posterior expected regional numbers of population-specific/shared causal SNPs.

143

## 144 **Defining LD blocks that are approximately independent in two populations**

145 For computational efficiency, PESCA assumes that, in both populations, a SNP in a given block is  
146 independent from all SNPs in all other blocks. This assumption requires defining blocks of SNPs that are  
147 approximately LD-independent in both populations. To this end, we first compute the “transethnic LD

148 matrix” ( $\mathbf{V}_{trans}$ ) from the East Asian- and European-ancestry LD matrices ( $\mathbf{V}_{EAS}$  and  $\mathbf{V}_{EUR}$ ) by setting each  
149 element in the transethnic LD matrix to the larger of the East Asian-specific and European-specific pairwise  
150 LD; i.e.  $\mathbf{V}_{trans,ij} = \mathbf{V}_{EAS,ij}$  if  $|\mathbf{V}_{EAS,ij}| > |\mathbf{V}_{EUR,ij}|$  and  $\mathbf{V}_{trans,ij} = \mathbf{V}_{EUR,ij}$  if  $|\mathbf{V}_{EUR,ij}| > |\mathbf{V}_{EAS,ij}|$ . The  
151 resulting matrix  $\mathbf{V}_{trans}$  is block diagonal due to shared recombination hotspots in both populations; in  
152 practice, we apply this procedure to each chromosome separately to obtain 22 chromosome-wide  
153 transethnic LD matrices. We then apply LDetect<sup>64</sup> to define LD blocks within the transethnic LD matrix.  
154 Applying this procedure using the 1000 Genomes Phase 3 reference panel<sup>59</sup> to create the transethnic LD  
155 matrix produces 1,368 LD blocks (average length of 2-Mb) that are approximately independent in  
156 individuals of East Asian and European ancestry.

157

### 158 **Enrichment of population-specific/shared causal SNPs in functional annotations**

159 We define the enrichment of population-specific/shared causal SNPs in a functional annotation as the ratio  
160 between the posterior and prior expected numbers of population-specific/shared causal SNPs. Specifically,  
161 we estimate the enrichment of population-specific/shared causal SNPs in a functional annotation  $k$  relative  
162 to the genome-wide background as

$$163 \quad \hat{\alpha}_{k,b} = \frac{E[q_{k,b} | \mathbf{Z}_1, \mathbf{Z}_2, \mathbf{f}^*]}{E[q_{k,b} | \mathbf{f}^*]} = \frac{\sum_{i \in \psi(k)} \Pr(\mathbf{C}_i = \mathbf{b} | \mathbf{Z}_1, \mathbf{Z}_2, \mathbf{f}^*)}{p_k \Pr(\mathbf{C}_i = \mathbf{b})}$$

164 where  $\mathbf{b} \in \{01, 10, 11\}$ ,  $q_{k,b}$  is the number of population-specific ( $\mathbf{b} = 01$  or  $\mathbf{b} = 10$ ) or shared ( $\mathbf{b} = 11$ )  
165 causal variants,  $\psi(k)$  is the set of SNPs in functional annotation  $k$ , and  $p_k$  is the number of SNPs in  
166 functional annotation  $k$ . The numerator,  $E[q_{k,b} | \mathbf{Z}_1, \mathbf{Z}_2, \mathbf{f}^*]$ , and denominator,  $E[q_{k,b} | \mathbf{f}^*]$ , represent the  
167 posterior (conditioned on  $Z$ -scores) and prior expected numbers of causal SNPs in functional annotation  $k$ ,  
168 respectively. We estimate the standard error of  $\hat{\alpha}_{k,b}$  using block jackknife over 1,368 non-overlapping  
169 approximately LD-independent blocks across the entire genome. The resulting enrichment test statistics,  
170  $\frac{\hat{\alpha}_{k,b} - 1}{SE(\hat{\alpha}_{k,b})}$ , approximately follow a t-distribution with degrees of freedom equal to the number of blocks minus  
171 one<sup>65</sup>. Since we are interested in identifying categories of SNPs that harbor more population-specific/shared  
172 causal SNPs than expected (i.e. enrichment  $> 1$ ), we report  $P$ -values from a one-tailed t-test where the null  
173 hypothesis is enrichment  $\leq 1$ .

174 We note that our definition of enrichment of causal SNPs is related to, but conceptually different  
175 from, enrichment of SNP-heritability<sup>13,16,66</sup>. A positive enrichment of causal SNPs in a functional category  
176 indicates that, compared to the genome-wide background, there are more causal SNPs in that category than  
177 expected; a positive enrichment of SNP-heritability in a category indicates that the average per-SNP effect  
178 size in the category is larger than the genome-wide average per-SNP effect size.

179

## 180 **Simulation framework**

181 We used real chromosome 22 genotypes of 10,000 individuals of East Asian ancestry from  
182 CONVERGE<sup>67,68</sup> and 50,000 individuals of white British ancestry from the UK Biobank<sup>69,70</sup> to simulate  
183 causal effects and phenotypes. First, we used PLINK<sup>71</sup> (v1.9) to remove redundant SNPs in the 1000  
184 Genomes Phase 3 reference panel<sup>59</sup> such that there is no pair of SNPs with  $r_{ij}^2 > 0.95$  ( $i \neq j$ ) in the  
185 reference panel. We also removed strand-ambiguous SNPs and SNPs with MAF  $< 1\%$  in either reference  
186 panel, resulting in a total of  $M=8,599$  SNPs on chromosome 22 to use in simulations.

187 Given genotypes at  $M$  SNPs for  $n_1$  and  $n_2$  individuals in populations 1 and 2, respectively, we  
188 assume the standard linear models  $\mathbf{y}_1 = \mathbf{X}_1\boldsymbol{\beta}_1 + \boldsymbol{\epsilon}_1$  (population 1) and  $\mathbf{y}_2 = \mathbf{X}_2\boldsymbol{\beta}_2 + \boldsymbol{\epsilon}_2$  (population 2).  
189 We assume the phenotypes are standardized within each population such that  $E[\mathbf{y}_1] = \mathbf{0}$ ,  $\text{Var}[\mathbf{y}_1] = \mathbf{I}$  and  
190  $E[\mathbf{y}_2] = \mathbf{0}$ ,  $\text{Var}[\mathbf{y}_2] = \mathbf{I}$ . Given  $\mathbf{c}_1$  and  $\mathbf{c}_2$ , the index sets of causal SNPs in each population, the effects at  
191 the  $i$ -th causal SNP in each population,  $\beta_{1i}$  and  $\beta_{2i}$ , are drawn from

$$192 \quad \boldsymbol{\beta}_{1\mathbf{c}_1} | \mathbf{c}_1 \sim N\left(\mathbf{0}, \frac{h_{g1}^2}{|\mathbf{c}_1|} \mathbf{I}_{\mathbf{c}_1}\right), \quad \boldsymbol{\beta}_{2\mathbf{c}_2} | \mathbf{c}_2 \sim N\left(\mathbf{0}, \frac{h_{g2}^2}{|\mathbf{c}_2|} \mathbf{I}_{\mathbf{c}_2}\right)$$

193 where  $|\mathbf{c}_1| = \sum_{i=1}^M c_{i1}$  and  $|\mathbf{c}_2| = \sum_{i=1}^M c_{i2}$  are the total numbers of causal SNPs in each population,  $h_{g1}^2$   
194 and  $h_{g2}^2$  are the total SNP-heritabilities in each population, and  $E[\beta_{1i}\beta_{1j}] = \text{Cov}[\beta_{1i}, \beta_{1j}] = 0$  and  
195  $E[\beta_{2i}\beta_{2j}] = \text{Cov}[\beta_{2i}, \beta_{2j}] = 0$  for SNPs  $i \neq j$ . The effects at non-causal SNPs are set to 0. The  
196 environmental effects for the  $n$ -th individual in each population are drawn i.i.d. from  $\epsilon_{1n} \sim N(0, 1 - h_{g1}^2)$   
197 and  $\epsilon_{2n} \sim N(0, 1 - h_{g2}^2)$ .

198 Finally, given the real genotypes and simulated phenotypes for each population, we compute Z-  
199 scores for all SNPs in population  $k$  as  $\mathbf{Z}_k = \frac{1}{\sqrt{n_k}} \mathbf{y}_k^T \mathbf{X}_k$ .

200

## 201 **Application to 9 complex traits and diseases**

202 We downloaded publicly available East Asian- and European-ancestry GWAS summary statistics for body  
203 mass index (BMI), mean corpuscular hemoglobin (MCH), mean corpuscular volume (MCV), high-density  
204 lipoprotein (HDL), low-density lipoprotein (LDL), total cholesterol (TC), triglycerides (TG), major  
205 depressive disorder (MDD), and rheumatoid arthritis (RA) from various sources (Table 1). The European-  
206 ancestry BMI GWAS is doubly corrected for genomic inflation factor<sup>72</sup>, which induces downward-bias in  
207 the estimated SNP-heritability; we correct this bias by re-inflating the Z-scores for this GWAS by a factor  
208 of 1.24. For all traits, we restrict to SNPs with MAF  $> 5\%$  in both populations to reduce noise in the LD  
209 matrices estimated from 1000 Genomes<sup>73</sup>. We use PLINK<sup>71</sup> (v.19) to remove redundant SNPs such that



210  $\hat{r}_{ij}^2 < 0.95$  for all SNPs  $i \neq j$  in both ancestry-matched 1000 Genomes<sup>73</sup> reference panels. The resulting  
211 numbers of SNPs that were analyzed for each trait are listed in Table 1.

212 For each trait, we test for enrichment of population-specific/shared causal SNPs in 53 publicly  
213 available tissue-specific gene annotations<sup>66</sup>, each of which represents a set of genes that are “specifically  
214 expressed” in a GTEx<sup>74</sup> tissue (referred to as “SEG annotations”). We set the threshold for statistical  
215 significance to  $P$ -value  $< 0.05/53$  (Bonferroni correction for the number of tests performed per trait).

216

## 217 **Results**

### 218 **Performance of PESCA in simulations**

219 We assessed the performance of PESCA in simulations starting from real genotypes of individuals with  
220 East Asian<sup>67,68</sup> (EAS) or European<sup>69,70</sup> (EUR) ancestry ( $N_{EAS} = 10K$ ,  $N_{EUR} = 50K$ ,  $M = 8,599$  SNPs)  
221 (Methods). First, we find that when in-sample LD from the GWAS is available, PESCA yields  
222 approximately unbiased estimates of the numbers of population-specific/shared causal SNPs (Figure 2, top  
223 panel). For example, in simulations where we randomly selected 50 EAS-specific, 50 EUR-specific, and  
224 50 shared causal SNPs, we obtained estimates (and corresponding standard errors) of 37.8 (4.5) EAS-  
225 specific, 40.3 (4.9) EUR-specific, and 64.9 (6.3) shared causal SNPs, respectively. When external reference  
226 LD is used (in this case, from 1000 Genomes<sup>73</sup>), PESCA yields a slight upward bias (Figure 2, bottom  
227 panel); on the same simulated data, we obtained estimates of 48.0 (5.9) EAS-specific, 53.7 (7.44) EUR-  
228 specific, and 78.8 (7.6) shared causal SNPs.

229 We observe a slight decrease in accuracy as the effective sample size, the product of SNP-  
230 heritability and sample size ( $N \times h_g^2$ ), decreases (Figures S1-S5). This is expected as the likelihood of the  
231 GWAS summary statistics is a function of  $N \times h_g^2$  (Methods) – as the expected per-SNP variance at causal  
232 SNPs ( $N \times h_g^2$  divided by the number of causal SNPs) decreases, GWAS summary statistics provide less  
233 information on the causal status of each SNP. Since it is often the case that the sample size of one GWAS  
234 is larger than that of the other, we perform simulations in which SNP-heritability is fixed to 0.05 in both  
235 populations, the EAS sample size is fixed to  $N_{EAS} = 10^4$ , and the EUR sample size is varied such that the  
236 effective sample size of the EUR GWAS is 1-5x larger than that of the EAS GWAS. We find that the  
237 genome-wide estimators are relatively robust with in-sample LD; with external estimates of LD, when  
238 effective sample size differs by a factor of 2 or more, the estimator for the number of EUR-specific causal  
239 SNPs becomes less biased while the EAS-specific and shared causal estimators become increasingly  
240 inflated (Figure S6). In addition, while it seems likely that the effect sizes of shared causal SNPs would be  
241 positively correlated across populations, the PESCA model assumes zero cross-population correlation in  
242 order to facilitate inference (Methods). We therefore perform simulations under an alternative model in

243 which EAS and EUR effect sizes at shared causal SNPs are positively correlated and find that our estimates  
244 of the genome-wide numbers of shared and population-specific causal SNPs become increasingly inflated  
245 and deflated, respectively, as the correlation increases from 0 to 1 (Figure S7).

246 Next, we use the estimated genome-wide proportions of population-specific/shared causal SNPs to  
247 evaluate per-SNP posterior probabilities of being causal in a single population (EAS only or EUR only) or  
248 in both populations (Methods). For each of the three causal configurations of interest (EAS only, EUR only,  
249 and shared), we observe an increase in the average correlation between the per-SNP posterior probabilities  
250 and the true causal status vector for that configuration as  $N \times h_g^2$  increases and as the total number of causal  
251 SNPs decreases (i.e. as per-SNP causal effect sizes increase) (Figures S8-S9). As expected, as the simulated  
252 proportion of shared causal SNPs increases, the average correlation between the posterior probabilities and  
253 true causal status vectors increases for the shared causal configuration and decreases for the population-  
254 specific causal configurations (Figures S8-S9). Since we did not have access to individual-level genotypes  
255 sampled from an ancestral group with shorter LD blocks (e.g., African-ancestry individuals), we use the  
256 EAS and EUR LD scores of each SNP as proxies for the strength of LD in the region housing the SNP to  
257 investigate the impact of population-specific LD patterns on the per-SNP posterior probabilities. Among  
258 the true causal SNPs (shared or population-specific), the posterior probabilities are relatively invariant to  
259 the magnitude of the EAS and EUR LD scores (Figure S10). In other words, under the PESCA framework,  
260 power to detect a given true causal SNP does not depend on its LD score in either population. Restricting  
261 to a set of “high-posterior SNPs” (defined here as SNPs with posterior probability greater than some  
262 threshold  $t$ ), we investigate whether PESCA systematically misclassifies SNPs based on the magnitude of  
263 their LD scores. Again, we observe that the average EAS and EUR LD scores do not vary significantly  
264 between the true and false positive classifications (Table S1). We then assessed whether our proposed  
265 statistics for testing for enrichment of population-specific/shared causal SNPs in functional annotations  
266 (Methods) are well-calibrated under the null hypothesis of no enrichment. Overall, when both population-  
267 specific and shared causal SNPs are drawn at random, the enrichment test statistics are conservative at  
268 different levels of polygenicity and GWAS power ( $N \times h_g^2$ ), irrespective of whether in-sample LD or  
269 external reference LD is used (Figures S11-S16).

270 Finally, we evaluated the computational efficiency of each stage of inference. In the first stage of  
271 inference – estimating genome-wide proportions of population-specific/shared causal SNPs – the  
272 maximization step of the EM algorithm uses Gibbs sampling to efficiently sample from the posterior of the  
273 causal status vectors (Supplemental Note). We set both the number of burn-in iterations and the number of  
274 samples to 5,000 for the MCMC within the maximization step and found that the overall EM typically  
275 converged within 200 iterations (Figures S17-S19). Run-time per EM-iteration increases with the number  
276 of causal SNPs (Figure S20); for example, in simulations with a total of 8,589 SNPs, when the maximum

277 number of EM iterations was set to 200, PESCA took an average of 90 minutes to obtain estimates in  
278 simulations with 20 randomly selected causal variants and 360 minutes in simulations with 100 randomly  
279 selected causal SNPs. This is expected because the likelihood function being maximized is proportional to  
280 the Bayes factor of only the causal SNPs (Supplemental Note). In the second stage of inference – evaluating  
281 posterior probabilities for each SNP – we set both the number of burn-in iterations and the number of  
282 samples to 5,000 for the MCMC and, to ensure stable estimates of the posterior probability, we report the  
283 average posterior probability from 20 iterations of the Gibbs sampling procedure (Supplemental Note). The  
284 average run-time was 5 minutes in simulations with 20 causal variants and 28 minutes in simulations with  
285 100 causal variants (Figure S20). We note that both stages of inference can be parallelized to decrease run  
286 time.

287

### 288 **Expected genome-wide proportions of shared causal SNPs for 9 complex traits**

289 We obtained publicly available GWAS summary statistics for 9 (non-independent) complex traits and  
290 diseases in individuals of EAS and EUR ancestry (average  $N_{EAS} = 94,621$ ,  $N_{EUR} = 103,507$ ) (Table 1) and  
291 applied PESCA to estimate the genome-wide proportions of population-specific/shared common causal  
292 SNPs (Methods). To ensure convergence, we applied 750 EM iterations for each trait (Figures S21-S23).  
293 Across the 9 traits, the estimated proportions of common causal SNPs in each population (the sum of the  
294 numbers of population-specific and shared causal SNPs) are consistent with previously reported estimates  
295 of polygenicity in single populations<sup>7,8,55,75,76</sup>. For example, we estimate that approximately 10% of common  
296 SNPs have nonzero effects on BMI in both EAS and EUR and that 2-3% have nonzero effects on the lipids  
297 traits (Table 1). The low estimates for major depressive disorder and rheumatoid arthritis may be explained  
298 in part by their small GWAS sample sizes. While there is heterogeneity in the estimated proportions of  
299 shared causal SNPs across the 9 traits, we find that most common causal SNPs are shared between the  
300 populations, consistent with findings from previous studies<sup>33</sup>. For example, for BMI, we estimate that  
301 approximately 96% of common causal SNPs in each population are also causal in the other; for total  
302 cholesterol (TC), we estimate that 73% of common causal SNPs in EAS and 77% of those in EUR are  
303 shared by both populations (Table 1).

304

### 305 **High-posterior SNPs are distributed nearly uniformly across the genome**

306 We define 1,368 regions that are approximately LD-independent in both populations and estimate the  
307 posterior expected numbers of population-specific/shared causal SNPs in each region (Methods). For all 9  
308 traits, high-posterior SNPs for both the population-specific and shared causal configurations are spread  
309 nearly uniformly across the genome (Figure 3, Figures S24-S31). For example, mean corpuscular  
310 hemoglobin (MCH) harbored, on average, 0.68 (S.D. 0.42) EAS-specific, 0.53 (S.D. 0.40) EUR-specific,

311 and 2.19 (S.D. 1.46) shared high-posterior SNPs per region (Figure 3, Figure S29). Aggregating posterior  
312 probabilities by chromosome, we find that the posterior expected numbers of EAS-specific, EUR-specific,  
313 and shared causal SNPs per chromosome are highly correlated with chromosome length (Figures S32-S34),  
314 recapitulating previous findings based on regional SNP-heritability<sup>55,60</sup>.

315

### 316 **Distributions of high-posterior SNPs across GWAS risk regions**

317 We aggregate per-SNP posterior probabilities within GWAS risk regions that are EAS-specific, EUR-  
318 specific, or shared by both populations and find that most GWAS risk regions harbor two or more shared  
319 high-posterior SNPs (Figure 4, Figures S35-S39), concordant with previous findings on allelic  
320 heterogeneity of complex traits<sup>55,77,78</sup>. On average across the 9 traits, we observe a 2.8x enrichment of shared  
321 high-posterior SNPs in population-specific GWAS risk regions relative to the genome-wide background.  
322 For example, for mean corpuscular hemoglobin (MCH), the EAS-specific and EUR-specific GWAS risk  
323 regions harbor an average of 3.0 (S.D. 1.7) and 3.3 (S.D. 1.5) shared high-posterior SNPs per region,  
324 respectively, whereas the average number of shared high-posterior SNPs per region across all regions is 2.0  
325 (S.D. 1.3) (Figure 4). While BMI, the blood traits (MCH and MCV), and rheumatoid arthritis have similar  
326 numbers of EAS-specific and EUR-specific high-posterior SNPs in their population-specific GWAS risk  
327 regions, the lipids traits (HDL, LDL, total cholesterol and triglycerides) have significantly more EAS-  
328 specific high-posterior SNPs in all GWAS risk regions (Figure 4, Figures S35-S39).

329 For each causal configuration (EAS-specific, EUR-specific, or shared), we examine the effect sizes  
330 of high-posterior SNPs (posterior probability > 0.8) in EAS and EUR (Figure 5). Across the 9 traits, the  
331 majority of EAS-specific high-posterior SNPs are nominally significant ( $p_{GWAS} < 5 \times 10^{-6}$ ) either in the  
332 EAS GWAS only or in both GWASs. While five EUR-specific high-posterior SNPs are nominally  
333 significant in only the EAS GWAS, the majority are nominally significant either in the EUR GWAS only  
334 or in both GWASs. We observe strong correlations between the effect sizes in EAS and EUR for all three  
335 sets of high-posterior SNPs (Pearson  $r^2$  of 0.79 [EAS-specific], 0.73 [EUR-specific], and 0.80 [shared])  
336 that are driven by SNPs that are nominally significant in both GWASs (Figure 5). Taken together, these  
337 results suggest that most population-specific GWAS risk regions harbor shared causal variants that are  
338 undetected in the other population due to heterogeneity in LD structures, allele frequencies, and/or GWAS  
339 sample sizes<sup>33</sup>.

340

### 341 **Enrichment of high-posterior SNPs near genes expressed in trait-relevant tissues**

342 Motivated by recent work that found enrichment of SNP-heritability in regions near genes that are  
343 “specifically expressed” in trait-relevant tissues and cell types (referred to as “SEG annotations”), we tested  
344 for enrichments of population-specific and shared causal SNPs in the same 53 tissue-specific SEG

345 annotations<sup>61</sup>. For a given causal configuration, the enrichment of causal SNPs in an annotation is defined  
346 as the ratio between the posterior and prior expected numbers of causal SNPs in the annotation (Methods).  
347 For 8 of the 9 traits, we find significant enrichment of shared high-posterior SNPs in at least one SEG  
348 annotation ( $P$ -value  $< 0.05/53$  to correct for 53 tests per trait) (Figures S40-S44). All SEG annotations with  
349 significant enrichments of population-specific high-posterior SNPs are also enriched with shared high-  
350 posterior SNPs for the same trait, providing additional evidence that many signatures of population-specific  
351 genetic architecture are induced by population-specific LD and allele frequencies rather than distinct  
352 genetic etiologies. We do not find enrichment of any high-posterior SNPs in any SEG annotation for major  
353 depressive disorder (MDD) (Figure S44), which could be due to low GWAS sample sizes (Table 1). Finally,  
354 for each SEG annotation, we obtain a meta-analyzed transethnic SNP-heritability enrichment by computing  
355 the inverse-variance weighted average of the EAS and EUR SNP-heritability enrichments (which are  
356 obtained separately using stratified LD score regression<sup>13,16</sup>). We observe a strong correlation between the  
357 meta-analyzed SNP-heritability enrichments and the enrichments of shared high-posterior SNPs (Figure 6),  
358 suggesting that SNP-heritability enrichments are largely driven by many low-effect SNPs rather than a  
359 small number of high-effect SNPs.

360

## 361 **Discussion**

362 We have presented PESCA, a method for estimating the genome-wide proportions of SNPs with nonzero  
363 effects in a single population (population-specific) or in two populations (shared) from GWAS summary  
364 statistics and estimates of LD. We applied PESCA to EAS and EUR GWAS summary statistics for 9  
365 complex traits and find that, while the lipids traits have significantly more EAS-specific common causal  
366 SNPs compared to the remaining traits, the majority of common causal SNPs are shared by both populations.  
367 Regions that harbor statistically significant GWAS associations for one population are enriched with SNPs  
368 with high-posterior probability of being causal in both populations; moreover, high-posterior SNPs  
369 (posterior probability  $> 0.8$  for any causal configuration) have highly correlated effect sizes in EAS and  
370 EUR, recapitulating results of previous studies<sup>33</sup>. For all traits except MDD, we identify tissue-specific SEG  
371 annotations<sup>66</sup> enriched with shared high-posterior SNPs and observe that all SEG annotations enriched with  
372 population-specific high-posterior SNPs are a subset of those enriched with shared high-posterior SNPs.  
373 Taken together, our results indicate that most population-specific GWAS risk regions contain shared  
374 common causal SNPs that are undetected in the second population due to differences in LD or allele  
375 frequencies. This suggests that localizing shared components of genetic architecture and explicitly  
376 correcting for population-specific LD and allele frequencies may help improve transferability of results  
377 from well-powered European-ancestry studies to other understudied populations. Based on the simulation

378 results in Figure S1 (in which 100% of causal SNPs are shared) and our estimates of SNP-heritability for  
379 the traits in Table 1, we recommend applying PESCA to summary statistics for which the *effective per-SNP*  
380 *sample size*,  $N \times h_g^2$  divided by the number of causal SNPs, is at least 3 for both GWASs. For a typical  
381 quantitative trait (e.g., Table 1), this corresponds to a total effective sample size of approximately  $N \times h_g^2 >$   
382 10,000.

383 We conclude by discussing the caveats and limitations of our analyses. First, the estimated  
384 proportions of causal SNPs must be interpreted with caution as they can be influenced by gene-environment  
385 interactions. For example, if a SNP has a nonzero effect on a trait only in the presence of environmental  
386 factors that are specific to EAS-ancestry individuals, PESCA will interpret that SNP as an EAS-specific  
387 causal SNP even though it would have a nonzero effect in Europeans in the presence of the same  
388 environmental factors.

389 Second, we chose to analyze a set of traits that were present in both the UK Biobank and Biobank  
390 Japan and for which GWAS summary statistics were publicly available. Since most publicly available  
391 summary statistics of large-scale GWAS are meta-analyses of smaller studies, in-sample LD is often  
392 unavailable. While PESCA with in-sample LD is relatively robust to differential GWAS power, with  
393 external LD, performance decreases when the GWAS effective sample sizes differ by more than a factor of  
394 2x. We note, however, that for the real traits analyzed in this work, effective sample size differs by a  
395 maximum factor of 2x (mean corpuscular hemoglobin; Table 1). Additionally, PESCA currently cannot be  
396 applied to admixed populations if in-sample LD is unavailable. An extension of PESCA to properly account  
397 for external/noisy estimates of LD would thus increase its utility; we defer a thorough investigation of this  
398 to future work. In parallel, in light of ongoing efforts at several institutions to establish biobanks<sup>69,70,79-81</sup>,  
399 we believe that well-powered GWASs (with in-sample LD) will become increasingly available for diverse  
400 and admixed populations. Another challenge is that many publicly available summary statistics were  
401 computed from fixed-effect meta-analyses or linear mixed models. Since the PESCA model is defined with  
402 respect to GWAS marginal effects estimated by ordinary least squares (OLS) regression, it is unclear  
403 whether PESCA is sensitive to non-OLS association statistics, which have different statistical properties;  
404 we defer a thorough investigation of this to future work.

405 Third, we restricted our analyses to SNPs with MAF > 5% in both populations to reduce noise in  
406 the LD matrices estimated from external reference panels. Consequently, the estimates we report in this  
407 work do not capture effects of low frequency or rare variants that are not well-tagged by common SNPs.  
408 Furthermore, since most common variants are shared across continental populations and rarer variants tend  
409 to localize among closely related populations<sup>73</sup>, our study design undersamples population-specific causal  
410 variants. We note, however, that lower MAF thresholds can be used if in-sample LD is available. We also  
411 note that for the purpose of improving transferability of polygenic risk scores (PRS) across populations,

412 prediction accuracy depends largely on the accuracy of the PRS weights at common SNPs (the average per-  
413 SNP contribution to total SNP-heritability is larger for common SNPs than for low frequency or rare  
414 variants<sup>11</sup>).

415 Finally, PESCA can be sensitive to model misspecification. For computational efficiency, PESCA  
416 relies on having regions that are approximately LD-independent in both populations; if there is LD leakage  
417 between regions, the estimated proportions of causal SNPs will be biased. We therefore recommend  
418 defining LD blocks for each pair of populations one analyzes. Similarly, to facilitate inference, PESCA  
419 does not explicitly model cross-population correlations of effect sizes at shared causal variants; we  
420 conjecture that modeling these correlations can further improve performance.

421

## 422 **Acknowledgements**

423 We are grateful to Alkes L. Price and Steven Gazal for helpful discussions that greatly improved the quality  
424 of this manuscript. We also thank Na Cai, Sriram Sankararaman, Jonathan Flint, and the UK Biobank  
425 (application #33297) for providing resources that made this work possible. This work was funded in part  
426 by the National Institutes of Health (NIH) under awards R01HG009120, R01MH115676, U01CA194393,  
427 T32NS048004, T32MH073526, and T32HG002536.

428

## 429 **Declaration of Interests**

430 The authors declare no competing interests.

431

## 432 **Web Resources**

433 GIANT consortium GWAS summary statistics: <http://portals.broadinstitute.org/collaboration/giant>

434 Biobank Japan GWAS summary statistics: <http://jenger.riken.jp/en/result>

435 GWAS summary statistics for hematological traits: <http://www.bloodcellgenetics.org>

436 LD score regression: <https://github.com/bulik/ldsc>

437 PLINK 1.9: <https://www.cog-genomics.org/plink/1.9/>

438 Popcorn: <https://github.com/brielin/Popcorn>

439 PESCA: <https://github.com/huwenboshi/pesca>

440 Specifically expressed genes: [https://data.broadinstitute.org/alkesgroup/LDSCORE/LDSC\\_SEG\\_ldscores](https://data.broadinstitute.org/alkesgroup/LDSCORE/LDSC_SEG_ldscores)

## References

1. Campbell, M. C. & Tishkoff, S. A. The evolution of human genetic and phenotypic variation in Africa. *Curr. Biol.* **20**, R166–R173 (2010).
2. Cavalli-Sforza, L. L., Menozzi, P. & Piazza, A. Demic expansions and human evolution. *Science* (80-. ). **259**, 639–646 (1993).
3. Pritchard, J. K., Pickrell, J. K. & Coop, G. The genetics of human adaptation: hard sweeps, soft sweeps, and polygenic adaptation. *Curr. Biol.* **20**, R208–R215 (2010).
4. Laland, K. N., Odling-Smee, J. & Myles, S. How culture shaped the human genome: bringing genetics and the human sciences together. *Nat. Rev. Genet.* **11**, 137 (2010).
5. Martin, A. R. *et al.* Human demographic history impacts genetic risk prediction across diverse populations. *Am. J. Hum. Genet.* **100**, 635–649 (2017).
6. Timpson, N. J., Greenwood, C. M. T., Soranzo, N., Lawson, D. J. & Richards, J. B. Genetic architecture: the shape of the genetic contribution to human traits and disease. *Nat. Rev. Genet.* **19**, 110 (2017).
7. O'Connor, L. J. *et al.* Extreme Polygenicity of Complex Traits Is Explained by Negative Selection. *Am. J. Hum. Genet.* (2019). doi:<https://doi.org/10.1016/j.ajhg.2019.07.003>
8. Zeng, J. *et al.* Signatures of negative selection in the genetic architecture of human complex traits. *Nat. Genet.* **50**, 746–753 (2018).
9. Zhang, Y., Qi, G., Park, J.-H. & Chatterjee, N. Estimation of complex effect-size distributions using summary-level statistics from genome-wide association studies across 32 complex traits. *Nat. Genet.* **50**, 1318–1326 (2018).
10. Zhu, X. & Stephens, M. Large-scale genome-wide enrichment analyses identify new trait-associated genes and pathways across 31 human phenotypes. *Nat. Commun.* **9**, 4361 (2018).
11. Yang, J. *et al.* Common SNPs explain a large proportion of the heritability for human height. *Nat. Genet.* **42**, 565–569 (2010).
12. Schoech, A. P. *et al.* Quantification of frequency-dependent genetic architectures in 25 UK Biobank traits reveals action of negative selection. *Nat. Commun.* **10**, 790 (2019).
13. Gazal, S. *et al.* Linkage disequilibrium-dependent architecture of human complex traits shows action of negative selection. *Nat. Genet.* **49**, 1421 (2017).
14. Speed, D., Hemani, G., Johnson, M. R. & Balding, D. J. Improved Heritability Estimation from Genome-wide SNPs. *Am. J. Hum. Genet.* **91**, 1011–1021 (2012).
15. Speed, D. *et al.* Reevaluation of SNP heritability in complex human traits. *Nat. Genet.* **49**, 986 (2017).
16. Finucane, H. K. *et al.* Partitioning heritability by functional annotation using genome-wide association summary statistics. *Nat Genet* **47**, 1228–1235 (2015).
17. Visscher, P. M. *et al.* 10 Years of GWAS Discovery: Biology, Function, and Translation. *Am. J. Hum. Genet.* **101**, 5–22 (2017).
18. Popejoy, A. B. & Fullerton, S. M. Genomics is failing on diversity. *Nature* **538**, 161 (2016).
19. Rosenberg, N. A. *et al.* Genome-wide association studies in diverse populations. *Nat. Rev. Genet.* **11**, 356 (2010).
20. Visscher, P. M., Brown, M. A., McCarthy, M. I. & Yang, J. Five Years of GWAS Discovery. *Am. J. Hum. Genet.* **90**, 7–24 (2012).
21. Kanai, M. *et al.* Genetic analysis of quantitative traits in the Japanese population links cell types to complex human diseases. *Nat. Genet.* **50**, 390 (2018).
22. Akiyama, M. *et al.* Genome-wide association study identifies 112 new loci for body mass index in the Japanese population. *Nat. Genet.* **49**, 1458 (2017).



23. Li, Z. *et al.* Genome-wide association analysis identifies 30 new susceptibility loci for schizophrenia. *Nat. Genet.* **49**, 1576 (2017).
24. Liu, J. Z. *et al.* Association analyses identify 38 susceptibility loci for inflammatory bowel disease and highlight shared genetic risk across populations. *Nat Genet* **47**, 979–986 (2015).
25. Ng, M. C. Y. *et al.* Meta-analysis of genome-wide association studies in African Americans provides insights into the genetic architecture of type 2 diabetes. *PLoS Genet.* **10**, e1004517 (2014).
26. Franceschini, N. *et al.* Genome-wide association analysis of blood-pressure traits in African-ancestry individuals reveals common associated genes in African and non-African populations. *Am. J. Hum. Genet.* **93**, 545–554 (2013).
27. Schick, U. M. *et al.* Genome-wide association study of platelet count identifies ancestry-specific loci in Hispanic/Latino Americans. *Am. J. Hum. Genet.* **98**, 229–242 (2016).
28. Kichaev, G. & Pasaniuc, B. Leveraging Functional-Annotation Data in Trans-ethnic Fine-Mapping Studies. *Am. J. Hum. Genet.* **97**, 260–271 (2015).
29. Mancuso, N. *et al.* The contribution of rare variation to prostate cancer heritability. *Nat. Genet.* **48**, 30 (2015).
30. Brown, B. C. *et al.* Transethnic genetic-correlation estimates from summary statistics. *Am. J. Hum. Genet.* **99**, 76–88 (2016).
31. Morris, A. P. Transethnic meta-analysis of genomewide association studies. *Genet. Epidemiol.* **35**, 809–822 (2011).
32. Lam, M. *et al.* Comparative genetic architectures of schizophrenia in East Asian and European populations. *Nat. Genet.* (2019). doi:10.1038/s41588-019-0512-x
33. Marigorta, U. M. & Navarro, A. High trans-ethnic replicability of GWAS results implies common causal variants. *PLoS Genet.* **9**, e1003566 (2013).
34. Kraft, P., Zeggini, E. & Ioannidis, J. P. A. Replication in genome-wide association studies. *Stat. Sci. A Rev. J. Inst. Math. Stat.* **24**, 561 (2009).
35. Li, Y. R. & Keating, B. J. Trans-ethnic genome-wide association studies: advantages and challenges of mapping in diverse populations. *Genome Med.* **6**, 91 (2014).
36. Okada, Y. *et al.* Genetics of rheumatoid arthritis contributes to biology and drug discovery. *Nature* **506**, 376–381 (2014).
37. Wu, Y. *et al.* Trans-Ethnic Fine-Mapping of Lipid Loci Identifies Population-Specific Signals and Allelic Heterogeneity That Increases the Trait Variance Explained. *PLOS Genet.* **9**, e1003379 (2013).
38. Asimit, J. L. *et al.* Stochastic search and joint fine-mapping increases accuracy and identifies previously unreported associations in immune-mediated diseases. *Nat. Commun.* **10**, 3216 (2019).
39. Zaitlen, N., Paşaniuc, B., Gur, T., Ziv, E. & Halperin, E. Leveraging genetic variability across populations for the identification of causal variants. *Am. J. Hum. Genet.* **86**, 23–33 (2010).
40. Wen, X., Luca, F. & Pique-Regi, R. Cross-population joint analysis of eQTLs: fine mapping and functional annotation. *PLoS Genet.* **11**, e1005176 (2015).
41. Vilhjálmsson, B. J. *et al.* Modeling linkage disequilibrium increases accuracy of polygenic risk scores. *Am. J. Hum. Genet.* **97**, 576–592 (2015).
42. Márquez-Luna, C., Loh, P.-R. & Price, A. L. Multiethnic polygenic risk scores improve risk prediction in diverse populations. *Genet. Epidemiol.* **41**, 811–823 (2017).
43. Lewis, C. M. & Vassos, E. Prospects for using risk scores in polygenic medicine. *Genome Med.* **9**, 96 (2017).
44. Curtis, D. Polygenic risk score for schizophrenia is more strongly associated with ancestry than with schizophrenia. *Psychiatr. Genet.* **28**, (2018).

45. Chen, C.-Y., Han, J., Hunter, D. J., Kraft, P. & Price, A. L. Explicit Modeling of Ancestry Improves Polygenic Risk Scores and BLUP Prediction. *Genet. Epidemiol.* **39**, 427–438 (2015).
46. Wojcik, G. L. *et al.* Genetic analyses of diverse populations improves discovery for complex traits. *Nature* **570**, 514–518 (2019).
47. Sirugo, G., Williams, S. M. & Tishkoff, S. A. The Missing Diversity in Human Genetic Studies. *Cell* **177**, 26–31 (2019).
48. Gurdasani, D., Barroso, I., Zeggini, E. & Sandhu, M. S. Genomics of disease risk in globally diverse populations. *Nat. Rev. Genet.* **20**, 520–535 (2019).
49. Martin, A. R. *et al.* Clinical use of current polygenic risk scores may exacerbate health disparities. *Nat. Genet.* **51**, 584–591 (2019).
50. Ikeda, M. *et al.* Genome-Wide Association Study Detected Novel Susceptibility Genes for Schizophrenia and Shared Trans-Populations/Diseases Genetic Effect. *Schizophr. Bull.* **45**, 824–834 (2019).
51. Shi, H. *et al.* Population-specific causal disease effect sizes in functionally important regions impacted by selection. *bioRxiv* 803452 (2019). doi:10.1101/803452
52. Galinsky, K. J. *et al.* Estimating cross-population genetic correlations of causal effect sizes. *Genet. Epidemiol.* **43**, 180–188 (2019).
53. Guo, J. *et al.* Quantifying genetic heterogeneity between continental populations for human height and body mass index. *bioRxiv* 839373 (2019). doi:10.1101/839373
54. Bulik-Sullivan, B. K. *et al.* LD Score regression distinguishes confounding from polygenicity in genome-wide association studies. *Nat Genet advance on*, 291–295 (2015).
55. Shi, H., Kichaev, G. & Pasaniuc, B. Contrasting the Genetic Architecture of 30 Complex Traits from Summary Association Data. *Am. J. Hum. Genet.* **99**, 139–153 (2016).
56. Hou, K. *et al.* Accurate estimation of SNP-heritability from biobank-scale data irrespective of genetic architecture. *Nat. Genet.* **51**, 1244–1251 (2019).
57. Farh, K. K.-H. *et al.* Genetic and epigenetic fine mapping of causal autoimmune disease variants. *Nature* **518**, 337–343 (2015).
58. Huang, H. *et al.* Fine-mapping inflammatory bowel disease loci to single-variant resolution. *Nature* **547**, 173–178 (2017).
59. Consortium, 1000 Genomes Project & others. An integrated map of genetic variation from 1,092 human genomes. *Nature* **491**, 56–65 (2012).
60. Loh, P.-R. *et al.* Contrasting genetic architectures of schizophrenia and other complex diseases using fast variance-components analysis. *Nat. Genet.* **47**, 1385 (2015).
61. Finucane, H. K. *et al.* Heritability enrichment of specifically expressed genes identifies disease-relevant tissues and cell types. *Nat. Genet.* **50**, 621–629 (2018).
62. Dai, B., Ding, S., Wahba, G. & others. Multivariate bernoulli distribution. *Bernoulli* **19**, 1465–1483 (2013).
63. Shi, H., Pasaniuc, B. & Lange, K. L. A multivariate Bernoulli model to predict DNaseI hypersensitivity status from haplotype data. *Bioinformatics* **31**, 3514–3521 (2015).
64. Berisa, T. & Pickrell, J. K. Approximately independent linkage disequilibrium blocks in human populations. *Bioinformatics* **32**, 283–285 (2016).
65. Miller, R. G. Jackknifing variances. *Ann. Math. Stat.* **39**, 567–582 (1968).
66. Finucane, H. *et al.* Heritability enrichment of specifically expressed genes identifies disease-relevant tissues and cell types. *bioRxiv* 103069 (2017).
67. Cai, N. *et al.* Sparse whole-genome sequencing identifies two loci for major depressive disorder. *Nature* **523**, 588 (2015).

68. Cai, N. *et al.* 11,670 whole-genome sequences representative of the Han Chinese population from the CONVERGE project. *Sci. data* **4**, 170011 (2017).
69. Sudlow, C. *et al.* UK biobank: an open access resource for identifying the causes of a wide range of complex diseases of middle and old age. *PLoS Med.* **12**, e1001779 (2015).
70. Bycroft, C. *et al.* The UK Biobank resource with deep phenotyping and genomic data. *Nature* **562**, 203–209 (2018).
71. Purcell, S. *et al.* PLINK: A Tool Set for Whole-Genome Association and Population-Based Linkage Analyses. *Am. J. Hum. Genet.* **81**, 559–575 (2007).
72. Locke, A. E. *et al.* Genetic studies of body mass index yield new insights for obesity biology. *Nature* **518**, 197–206 (2015).
73. Consortium, T. 1000 G. P. *et al.* A global reference for human genetic variation. *Nature* **526**, 68 (2015).
74. Lonsdale, J. *et al.* The Genotype-Tissue Expression (GTEx) project. *Nat. Genet.* **45**, 580 (2013).
75. Johnson, R., Shi, H., Pasaniuc, B. & Sankararaman, S. A unifying framework for joint trait analysis under a non-infinitesimal model. *Bioinformatics* **34**, i195–i201 (2018).
76. Holland, D. *et al.* Beyond SNP Heritability: Polygenicity and Discoverability of Phenotypes Estimated with a Univariate Gaussian Mixture Model. *bioRxiv* 133132 (2019). doi:10.1101/133132
77. Hormozdiari, F. *et al.* Widespread allelic heterogeneity in complex traits. *Am. J. Hum. Genet.* **100**, 789–802 (2017).
78. Gusev, A. *et al.* Quantifying Missing Heritability at Known GWAS Loci. *PLOS Genet.* **9**, e1003993 (2013).
79. Nagai, A. *et al.* Overview of the BioBank Japan Project: Study design and profile. *J. Epidemiol.* **27**, S2–S8 (2017).
80. Gaziano, J. M. *et al.* Million Veteran Program: A mega-biobank to study genetic influences on health and disease. *J. Clin. Epidemiol.* **70**, 214–223 (2016).
81. Leitsalu, L. *et al.* Cohort Profile: Estonian Biobank of the Estonian Genome Center, University of Tartu. *Int. J. Epidemiol.* **44**, 1137–1147 (2015).
82. Astle, W. J. *et al.* The allelic landscape of human blood cell trait variation and links to common complex disease. *Cell* **167**, 1415–1429 (2016).
83. Teslovich, T. M. *et al.* Biological, clinical and population relevance of 95 loci for blood lipids. *Nature* **466**, 707 (2010).
84. Wray, N. R., Sullivan, P. F. & others. Genome-wide association analyses identify 44 risk variants and refine the genetic architecture of major depression. *bioRxiv* 167577 (2017).

| Trait name (abbrev.)              | Pop. | Ref. | $\hat{h}_g^2$ (S.E.) % | Sample size (N) | Total # SNPs (MAF > 5%) | EAS-specific causals (S.E.) | EUR-specific causals (S.E.) | Shared causals (S.E.) | $\hat{\rho}_g$ (S.E.) <sup>51</sup> |
|-----------------------------------|------|------|------------------------|-----------------|-------------------------|-----------------------------|-----------------------------|-----------------------|-------------------------------------|
| Body Mass Index (BMI)             | EAS  | 22   | 19.8 (0.64)            | 224,698         | 258,130                 | 982 (2)                     | 1,033 (2)                   | 25,641 (16)           | 0.80                                |
|                                   | EUR  | 72   | 20.6 (0.91)            | 158,284         |                         | 0.4%                        | 0.4%                        | 10%                   | (0.02)                              |
| Mean Corpuscular Hemoglobin (MCH) | EAS  | 21   | 18.6 (2.2)             | 108,054         | 480,684                 | 1,165 (6)                   | 728 (3)                     | 3,082 (4)             | 0.88                                |
|                                   | EUR  | 82   | 22.7 (3.2)             | 172,332         |                         | 0.2%                        | 0.2%                        | 0.6%                  | (0.05)                              |
| Mean Corpuscular Volume (MCV)     | EAS  | 21   | 21.0 (2.13)            | 108,256         | 480,678                 | 1004 (4)                    | 737 (5)                     | 3,256 (8)             | 0.89                                |
|                                   | EUR  | 82   | 23.6 (3.1)             | 172,433         |                         | 0.2%                        | 0.2%                        | 0.7%                  | (0.05)                              |
| High Density Lipoprotein (HDL)    | EAS  | 21   | 20.7 (3.03)            | 70,657          | 268,198                 | 3,167 (12)                  | 652 (2)                     | 4,789 (9)             | 0.89                                |
|                                   | EUR  | 83   | 16.4 (2.2)             | 89,614          |                         | 1%                          | 0.2%                        | 2%                    | (0.06)                              |
| Low Density Lipoprotein (LDL)     | EAS  | 21   | 9.5 (1.3)              | 72,866          | 268,201                 | 969 (5)                     | 742 (2)                     | 3,129 (6)             | 0.66                                |
|                                   | EUR  | 83   | 13.6 (1.93)            | 85,491          |                         | 0.4%                        | 0.3%                        | 1%                    | (0.11)                              |
| Total Cholesterol (TC)            | EAS  | 21   | 8.1 (0.84)             | 128,305         | 268,197                 | 1,892 (3)                   | 1,493 (5)                   | 5,058 (12)            | 0.91                                |
|                                   | EUR  | 83   | 22.5 (2.1)             | 89,865          |                         | 0.7%                        | 0.6%                        | 2%                    | (0.07)                              |
| Triglyceride (TG)                 | EAS  | 21   | 13.5 (3.3)             | 105,597         | 268,198                 | 2,245 (3)                   | 511 (4)                     | 3,432 (7)             | 0.93                                |
|                                   | EUR  | 83   | 13.6 (2.2)             | 86,502          |                         | 0.8%                        | 0.2%                        | 1%                    | (0.07)                              |
| Major Depressive Disorder (MDD)   | EAS  | 67   | 35.6 (3.4)             | 10,640          | 389,593                 | 88 (4)                      | 3,280 (6)                   | 7,830 (6)             | 0.34                                |
|                                   | EUR  | 84   | 19.0 (1.8)             | 18,759          |                         | 0.02%                       | 0.84%                       | 2%                    | (0.07)                              |
| Rheumatoid Arthritis (RA)         | EAS  | 36   | 28.9 (18.3)            | 22,515          | 526,206                 | 3 (0.3)                     | 124 (2)                     | 1,080 (6)             | 0.87                                |
|                                   | EUR  | 36   | 9.5 (1.9)              | 58,284          |                         | 6e-04%                      | 0.02%                       | 0.2%                  | (0.10)                              |

Table 1: **Estimated numbers and percentages of population-specific/shared common causal SNPs for 9 complex traits.** We estimated genome-wide SNP-heritability using LD score regression<sup>54</sup> with the intercept constrained to 1 (i.e. assuming no population stratification). Trans-ethnic genetic correlation estimates ( $\hat{\rho}_g$ ) computed from a similar set of summary statistics were obtained from a previous study<sup>51</sup>. Standard errors of the estimated numbers of population-specific/shared causal SNPs were computed using the last 50 iterations of the EM-MCMC algorithm.

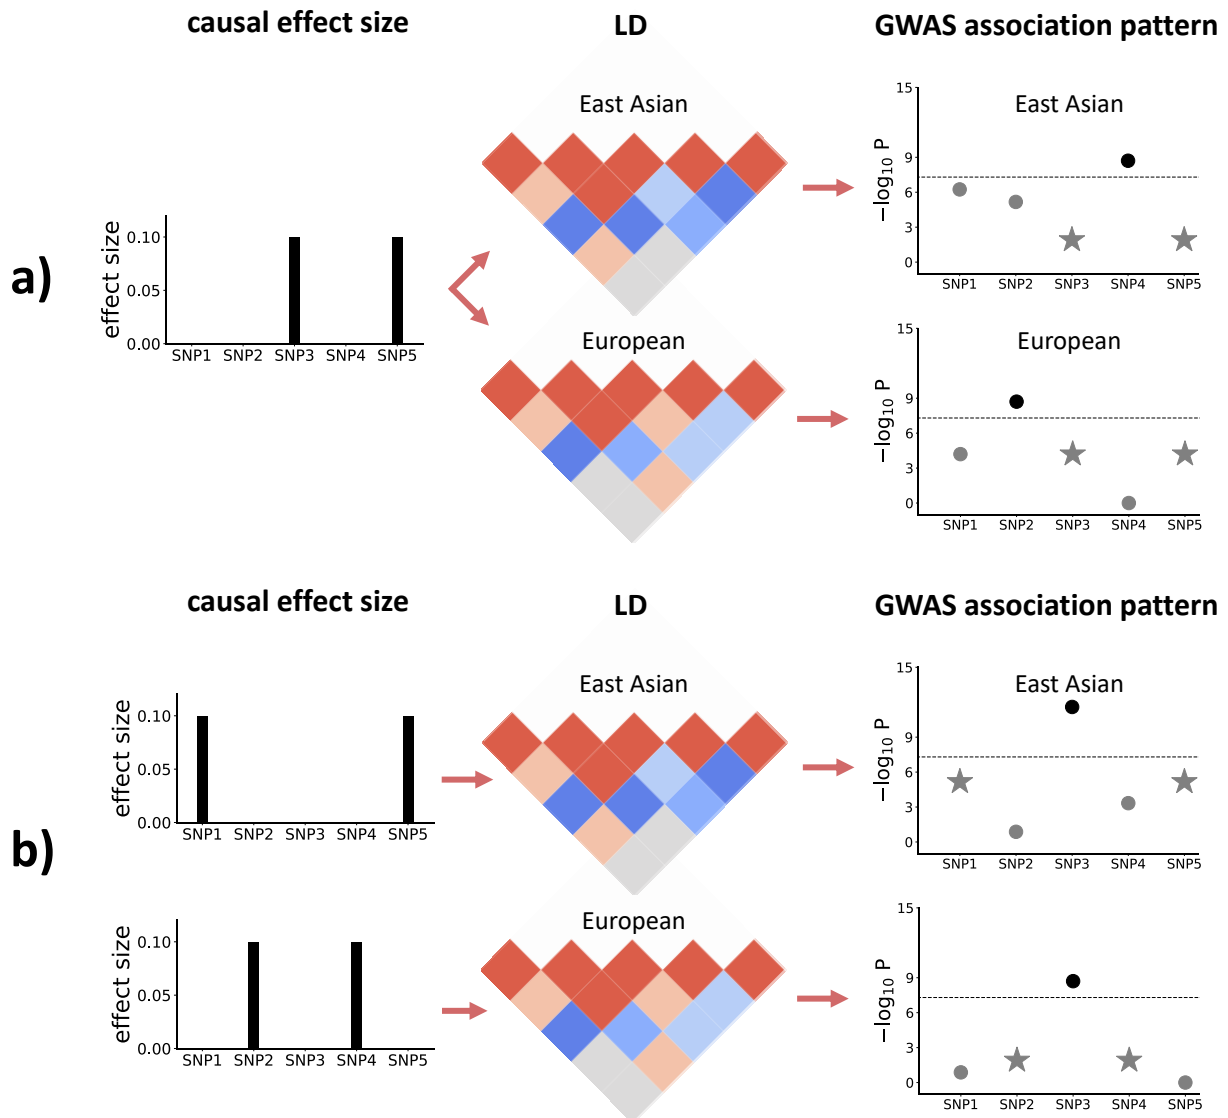

Figure 1: **Toy examples to illustrate how population-specific LD patterns affect GWAS associations.**

a) SNPs 3 and 5 are causal in both East Asians and Europeans and have the same population-specific causal effect size of 0.1. However, due to different LD patterns in East Asians and Europeans, SNPs 2 and 4 are observed to be GWAS-significant, respectively. b) Different SNPs are causal in East Asians (SNPs 1 and 5) and Europeans (SNPs 2 and 4). However, due to population-specific LD, SNP 3 is observed to be GWAS-significant in both populations. The stars in the rightmost plots represent the SNPs with true nonzero effects; the GWAS-significant SNP is highlighted in a darker color.

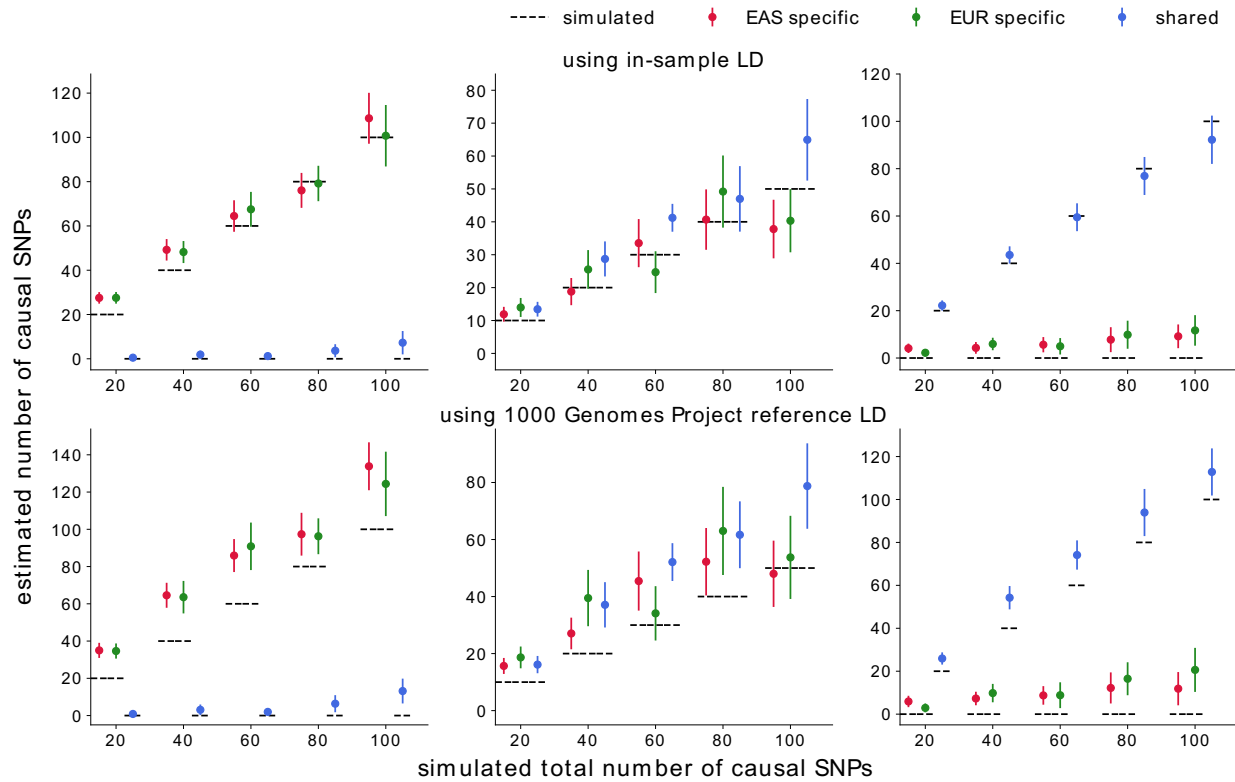

Figure 2: **Genome-wide estimates of the numbers of population-specific/shared causal SNPs in simulations.** The estimates are approximately unbiased when in-sample LD is used (top panel) and upward-biased estimates when external reference LD is used (bottom panel). For both populations, we simulate such that the product of SNP-heritability and GWAS sample size is 500. Mean and standard errors were obtained from 25 independent simulations. Error bars represent  $\pm 1.96$  of the standard error.

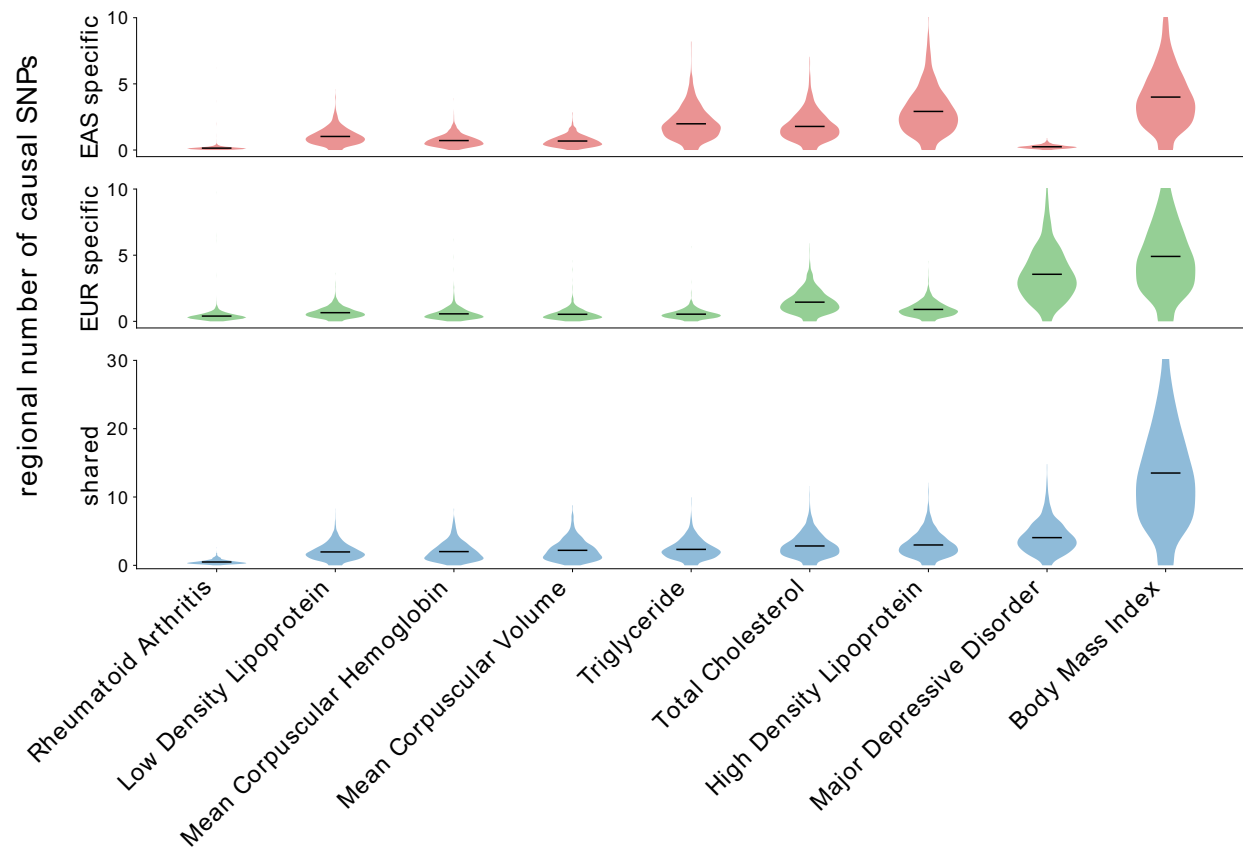

Figure 3: **Distributions of the numbers of population-specific/shared causal SNPs across 1,368 regions that are approximately independent in both EAS and EUR.** Each violin plot represents the distribution of the posterior expected number of population-specific or shared causal SNPs per region; details on how the regions were defined can be found in the Methods. For a single region, the posterior expected number of SNPs in a given causal configuration is estimated by summing, across all SNPs in the region, the per-SNP posterior probabilities of having that causal configuration (Methods). The dark lines mark the means of the distributions. The traits are sorted on the x-axis by the average number of shared high-posterior SNPs per region.

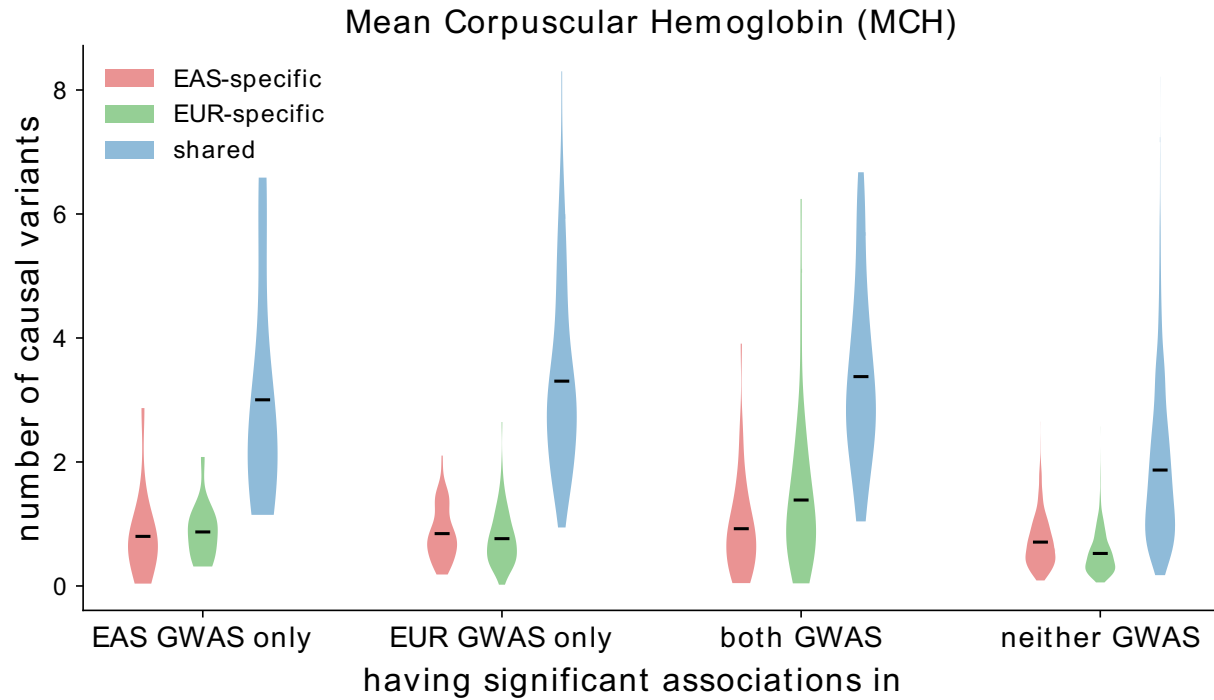

Figure 4: **Distributions of the numbers of population-specific/shared causal variants at GWAS risk regions for mean corpuscular hemoglobin (MCH).** Each violin plot represents the distribution of the posterior expected number of population-specific (red/green) or shared (blue) causal SNPs at regions with significant associations ( $p_{GWAS} < 5 \times 10^{-8}$ ) in EAS GWAS only, EUR GWAS only, both EAS and EUR, and neither GWAS. The dark lines mark the means of the distributions.



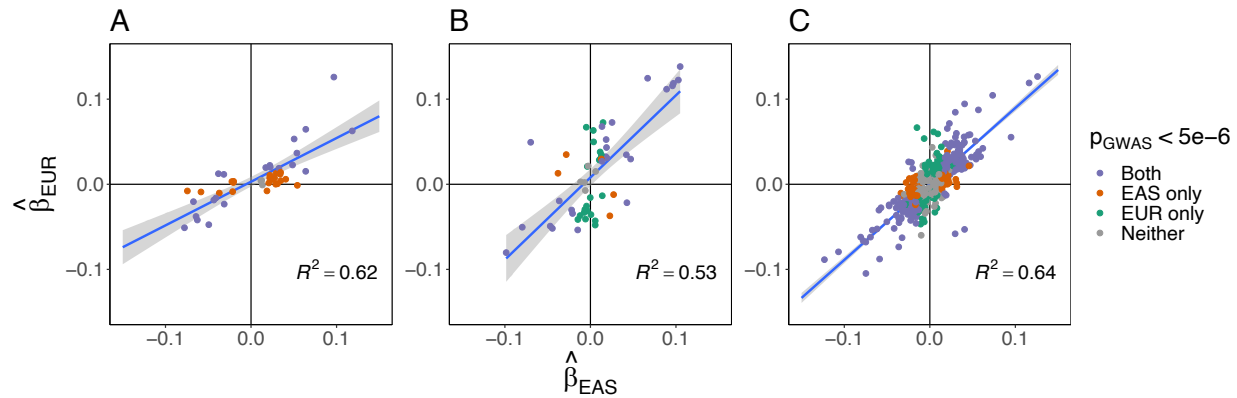

Figure 5: **Marginal regression coefficients of high-posterior SNPs for 9 complex traits.** Each plot corresponds to one of the three causal configurations of interest: EAS-specific (A), EUR-specific (B), and shared (C). Each point represents a SNP with posterior probability  $> 0.8$  for a single trait. The x-axis and y-axis mark the marginal regression coefficients in the EAS-ancestry GWAS and EUR-ancestry GWAS, respectively. The colors indicate whether the SNP is nominally significant ( $p_{GWAS} < 5 \times 10^{-6}$ ) in both GWASs (purple), the EAS GWAS only (orange), the EUR GWAS only (green), or in neither GWAS (gray). The gray band marks the 95% confidence interval of the regression line.

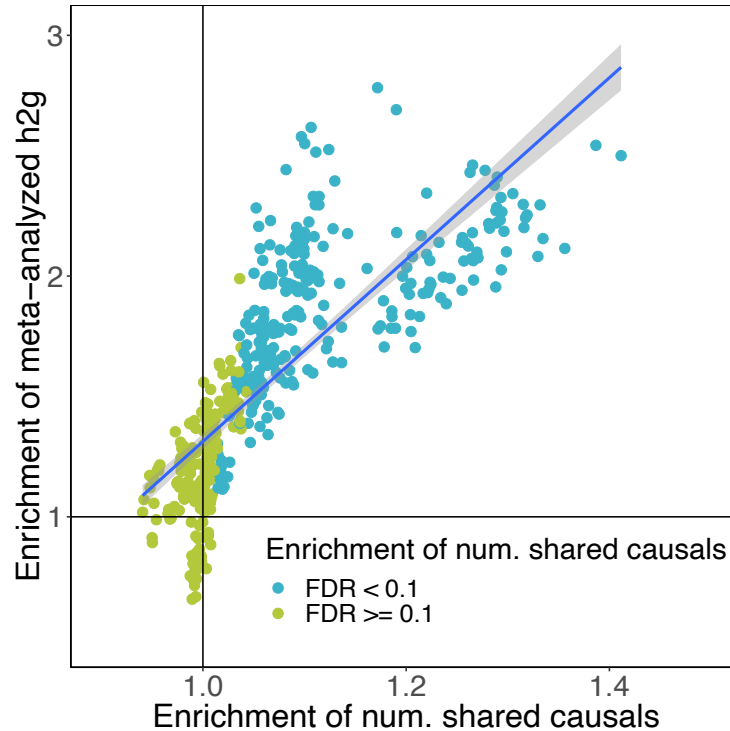

**Figure 6: Enrichments of shared high-posterior SNPs in 53 tissue-specific functional categories are highly correlated with SNP-heritability enrichments.** Each point represents a trait-tissue pair; each tissue-specific functional category represents a set of genes that are “specifically expressed” in one of 53 GTEx tissues (53 SEG annotations). The x-axis is the enrichment of shared high-posterior SNPs in the SEG annotation obtained from PESCA. The y-axis is the meta-analyzed transethnic SNP-heritability explained by the SEG annotation, defined as the inverse-variance weighted average of the EAS and EUR SNP-heritability enrichments (obtained separately using stratified LD score regression). The points are colored by whether the trait has a statistically significant enrichment of shared high-posterior SNPs in the corresponding SEG annotation (FDR < 0.1). Enrichment estimates and standard errors for each trait-tissue pair can be found in Figures S40-S44.
